1  
2  
3  
4  
5  
6  
7  
8  
9  
10  
11  
12  
13  
14  
15  
16  
17  
18  
19  
20  
21  
22

**Dynamic interactions between the RNA chaperone Hfq, small regulatory RNAs and mRNAs in live bacterial cells**

Seongjin Park<sup>1#</sup>, Karine Prévost<sup>2#</sup>, Emily M. Heideman<sup>1</sup>, Marie-Claude Carrier<sup>2</sup>, Matthew A. Reyer<sup>3</sup>, Wei Liu<sup>1</sup>, Eric Massé<sup>2\*</sup>, Jingyi Fei<sup>1,3\*</sup>

<sup>1</sup> Department of Biochemistry and Molecular Biology, The University of Chicago; <sup>2</sup> RNA Group, Department of Biochemistry, University of Sherbrooke; <sup>3</sup> Institute for Biophysical Dynamics, The University of Chicago.

# Equal contribution

\*Correspondence: [jingyifei@uchicago.edu](mailto:jingyifei@uchicago.edu) (JF, Lead contact), [Eric.Masse@USherbrooke.ca](mailto:Eric.Masse@USherbrooke.ca) (EM)

## 23 **Abstract**

24 RNA binding proteins play myriad roles in controlling and regulating RNAs and RNA-mediated  
25 functions, often through simultaneous binding to other cellular factors. In bacteria, the RNA  
26 chaperone Hfq modulates post-transcriptional gene regulation. Absence of Hfq leads to the loss  
27 of fitness and compromises the virulence of bacterial pathogens. Using live-cell super-resolution  
28 imaging, we are able to distinguish Hfq binding to different sizes of cellular RNAs. We demonstrate  
29 that under normal growth conditions, Hfq exhibits widespread mRNA binding activity. Particularly,  
30 the distal face of Hfq contributes mostly to the mRNA binding *in vivo*. In addition, binding of Hfq  
31 to these mRNAs can recruit RNase E to promote turnover of these mRNAs in an sRNA-  
32 independent manner, providing one mechanism to release Hfq from the pre-bound mRNAs.  
33 Finally, our data indicate that sRNAs, once expressed, can either co-occupy Hfq with the mRNA  
34 or displace the mRNA from Hfq, suggesting mechanisms through which sRNAs rapidly access  
35 Hfq to induce sRNA-mediated gene regulation. Our data collectively demonstrate that Hfq  
36 dynamically changes its interactions with different RNAs in response to changes in cellular  
37 conditions.

38

## 39 **Main Text**

40 In all three kingdoms of life, RNA binding proteins (RBPs) play myriad roles in controlling and  
41 regulating RNAs and RNA-mediated functions. As one of the most abundant RNA binding proteins  
42 in bacterial cells, Hfq is an important and prevalent post-transcriptional gene regulator<sup>1-3</sup>. The  
43 most recognized functions of Hfq as a chaperone of small regulatory RNA (sRNA)-mediated gene  
44 regulation are to stabilize sRNAs and to promote sRNAs binding to their cognate target mRNAs<sup>1-</sup>  
45 <sup>3</sup>. Binding of sRNAs to target mRNAs further leads to changes in the translation activity and the  
46 stability of the mRNAs<sup>4,5</sup>. Moreover, other functions of Hfq in regulating translation and  
47 degradation of mRNAs independent of sRNA-mediated regulatory pathway have also been  
48 reported<sup>6-10</sup>. The functional importance of Hfq is evident by the fact that loss of Hfq compromises

49 the fitness of bacterial cells, especially under harsh conditions, and abolishes the virulence of  
50 bacterial pathogens<sup>11,12</sup>.

51 Hfq binds broadly to cellular mRNAs and sRNAs<sup>13–15</sup>, in line with its main biological  
52 functions. Hfq can bind RNAs through multiple interfaces of its homohexameric structure. The  
53 surface containing the N-terminal  $\alpha$ -helices is referred as the “proximal face” of the Hfq hexamer,  
54 whereas the opposite surface is referred as the “distal face”, and the outer ring as the “rim” (Figure  
55 1a). The proximal face binds preferably U-rich sequences, and the distal face prefers A-rich  
56 sequences, with the exact motif of the A-rich sequence depending on the species<sup>16–20</sup>. The rim  
57 can also interact with UA-rich RNAs through the patch of positively charged residues<sup>21–23</sup>. Finally,  
58 the unstructured C-terminal end of Hfq can also interact with certain RNAs to promote the  
59 exchange of RNAs<sup>18,21,24</sup>. The most refined model describing the interactions between Hfq and  
60 sRNAs/mRNAs has sorted sRNAs into two classes<sup>25</sup>. The proximal face of Hfq is generally  
61 important for binding of the sRNAs through their poly-U tail of the Rho-independent terminator.  
62 Class I sRNAs (such as RyhB and DsrA) use the rim as the second binding site, whereas class II  
63 sRNAs (such as ChiX and MgrR) use the distal face as the second binding site<sup>25</sup>. In addition, the  
64 preferred target mRNAs of the two classes of the sRNA are proposed to have the complementary  
65 binding sites on Hfq, *i.e.* class I sRNA-targeted mRNAs binding to the distal face, and class II  
66 sRNA-targeted mRNA binding to the rim, in order to efficiently form sRNA-mRNA complexes<sup>25</sup>.  
67 As for many other RBPs, the functions of Hfq are facilitated by its interactions with other essential  
68 protein factors. Particularly, RNase E, the key ribonuclease for processing and turnover of  
69 ribosomal RNA (rRNAs) and mRNAs, is known to interact with Hfq through its C-terminal scaffold  
70 region<sup>26–28</sup>. The Hfq-RNase E interactions can promote degradation of the sRNA-targeted  
71 mRNA<sup>28–31</sup>.

72 While Hfq is an abundant RBP in bacterial cells<sup>32,33</sup>, it is still considered to be limiting, given  
73 the abundance of cellular mRNAs and sRNAs. Particularly, *in vitro* studies on specific sRNAs  
74 demonstrate that Hfq binds RNAs tightly with a dissociation constant of nM, and the Hfq-RNA

75 complexes are stable with a lifetime of >100 minutes<sup>34–36</sup>. However, under stress conditions,  
76 induced sRNAs can regulate target mRNAs within minutes, raising a long-standing question of  
77 how sRNAs can rapidly access Hfq that might be tightly bound by pre-existing cellular RNAs. To  
78 address this question, a model of RNA exchange on Hfq, *i.e.* a RNA can actively displace another  
79 RNA from Hfq, was proposed to account for the fast sRNA-mediated stress response<sup>2,3,37</sup>. While  
80 *in vitro* biophysical experiments can be used to measure the affinity of RBP binding to many  
81 different RNAs under many different controllable conditions, the *in vitro* nature of these  
82 experiments makes it difficult to replicate the concentrations, compartmentalization, crowding,  
83 competitive binding and changes in cellular conditions that can affect the behavior and function  
84 of RBPs in live cells. Therefore, the mechanism(s) that can recycle Hfq from pre-bound RNAs in  
85 live cells remains to be elucidated.

86 In order to address this question in a cellular context, we sought to measure the diffusivity  
87 of Hfq in live *Escherichia. coli* cells, using single-molecule localization microscopy (SMLM)<sup>38</sup>, with  
88 a rationale that the diffusivity is affected by the molecular weight of the molecules, and therefore  
89 can report the interactions between Hfq with different cellular components. By measuring Hfq  
90 diffusivity under a variety of cellular conditions in combination with other biochemical assays, we  
91 demonstrate that Hfq dynamically changes its interactions with different RNAs in response to  
92 changes in cellular conditions, reveal a new sRNA-independent pathway for Hfq-regulated mRNA  
93 turnover, and illustrate that the two classes of sRNA can gain access to mRNA pre-bound Hfq  
94 through different mechanisms.

95

## 96 **Results**

### 97 ***Cellular Hfq freely diffuses in the absence of stress***

98 Hfq was tagged by a photo-switchable fluorescent protein (FP), mMaple3<sup>39</sup>, at the C-terminus and  
99 the fused *hfq* gene was integrated into the genomic locus to replace the wild-type (WT) *hfq*  
100 (denoted as “*hfq-mMaple3*”, Methods). The strain harboring *hfq-mMaple3* showed comparable

101 growth curve as the WT strain, whereas  $\Delta hfq$  showed a growth defect (Figure S1). In addition,  
102 Hfq-mMaple3 showed activity comparable to WT Hfq protein, as revealed by Northern blots of  
103 RyhB-mediated *sodB* mRNA degradation, and MicA-mediated *ompA* mRNA degradation (Figure  
104 S2).

105 We performed single-particle tracking using SMLM in two dimensions (2D). Imaging  
106 conditions and parameters for applying tracking algorithm were optimized using fixed samples as  
107 the control (Figure S3). We first tracked Hfq-mMaple3 in live cells grown at exponential phase  
108 (referred as “no treatment”, or “NT” case). In the NT condition, Hfq-mMaple3 exhibited a relatively  
109 uniform distribution within the cell (Figure 1b), consistent with the distribution revealed by the  
110 earlier live-cell imaging with Hfq tagged by a different FP (Dendra2)<sup>40</sup>. Quantification of Hfq-  
111 mMaple3 localization with DNA stained by Hoechst revealed a slightly higher cytoplasm  
112 enrichment than nucleoid localization in the NT condition (Figure 1c). We did not observe a helical  
113 organization along the longitudinal direction of the bacterial cell<sup>41</sup>, membrane localization<sup>42</sup>, or cell  
114 pole localization<sup>43</sup>, as reported in a few fixed-cell experiments. In addition, we calculated the one-  
115 step squared displacement (*osd*) of individual Hfq-mMaple3 protein at each time step and plotted  
116 the *osd* as a function of the cellular coordinate in a diffusivity heatmap (Figure 1b). The heatmap  
117 and quantification of the average *osd* suggest that Hfq diffuses similarly within the nucleoid and  
118 cytoplasmic region (Figure 1d).

119

### 120 ***Binding of mRNAs to Hfq decreases its diffusivity primarily through the distal face of Hfq***

121 We first tested the effect of mRNA on Hfq-mMaple3 diffusivity by treating the cells with rifampicin  
122 (Figure 2a), an antibiotic that inhibits transcription and results in the loss of most cellular mRNAs.  
123 We estimated the effective diffusion coefficient (*D*) by fitting the power function to the mean  
124 squared displacement (MSD) as a function of time lag ( $\Delta t$ ) (Figure 2b). Transcription inhibition  
125 increased the diffusivity of Hfq-mMaple3 (Figure 2b), suggesting that a fraction of Hfq-mMaple3  
126 proteins are associated with cellular mRNAs, consistent with previous reports<sup>40</sup>. As a control,

127 mMaple3 protein alone did not show any changes in diffusivity upon rifampicin treatment (Figure  
128 S4).

129 We next introduced point mutations at each RNA binding face of Hfq-mMaple3<sup>25,44</sup>, and  
130 imaged these mutant Hfq-mMaple3 proteins under NT and rifampicin treated conditions. With  
131 rifampicin treatment, all Hfq mutants exhibited similar diffusivity. However, mutations on different  
132 interfaces changed Hfq diffusivity in the NT case to different levels, suggesting that mutation on  
133 different faces changed the ability of Hfq to bind cellular mRNAs. Specially, both proximal face  
134 mutants (Q8A and F42A) exhibited similar diffusivity as the WT Hfq-mMaple3; both rim mutations  
135 (R16A and R19D) had a minor increase in diffusivity under NT condition; and both distal face  
136 mutations (Y25D and K31A) led to a large increase in the diffusivity under NT condition (Figure  
137 2c). Comparison of the WT and the mutant Hfq-mMaple3 proteins supports conclusions that Hfq  
138 binds mRNAs in the cell and that binding of mRNAs is primarily achieved through the interactions  
139 with the distal face of Hfq, whereas the rim also contributes to the mRNA binding in a minor way.  
140

#### 141 ***Most Hfq proteins are occupied by mRNAs in the cell during exponential growth***

142 Under our experimental conditions, mMaple3 protein alone had a D of  $1.8 \pm 0.2 \mu\text{m}^2/\text{s}$  (fit with a  
143 power function) or  $2.7 \pm 0.2 \mu\text{m}^2/\text{s}$  (fit with a linear function) (Figure S4), close to the reported range  
144 of D for fluorescent proteins (~27 kDa) ( $3\text{-}8 \mu\text{m}^2/\text{s}$ )<sup>45</sup>. WT and mutant Hfq-mMaple3 proteins upon  
145 rifampicin treatment consistently showed a diffusion coefficient of  $1.2\text{-}1.5 \mu\text{m}^2/\text{s}$  (Figure 2c).  
146 Considering the power-law dependence of D on Mw of biomolecules<sup>45</sup>, such a change in D  
147 corresponds to a 2-4 fold change in Mw (~50-100 kDa), which is smaller than hexameric Hfq-  
148 mMaple3 (~220 kDa). This observation suggests that in the absence of RNA binding, a fraction  
149 of Hfq may exist as monomer in the cell. WT Hfq-mMaple3 in the NT case had a D of  $0.50 \pm 0.07$   
150  $\mu\text{m}^2/\text{s}$ , corresponding to a Mw of 2.1 MDa, again assuming the power-law relationship between D  
151 and Mw. Considering the average length of bacterial mRNAs to be 1 kb (~330 kDa), and Mw of  
152 bacterial ribosome (~2.5 MDa), this reduction in D supports the interpretation that a significant

153 fraction of WT Hfq proteins are associated with mRNAs in the NT case, and that a fraction of the  
154 associated mRNAs are translated by the ribosomes. In addition, previous experiments have  
155 measured the diffusion coefficient of ribosomes or ribosomal complexes to be  $0.04\text{-}0.5\ \mu\text{m}^2/\text{s}$ <sup>46-</sup>  
156 <sup>48</sup>. The average D of WT Hfq-mMaple3 under NT condition is at the upper limit of range for  
157 ribosomes, again indicating the D value of mRNA-associated Hfq very likely represents an  
158 average value of both untranslated and translated mRNAs.

159 In order to estimate the fraction of mRNA-associated Hfq-mMaple3, we plotted  $\log(\text{osd})$  in  
160 a histogram. Consistent with D values, distribution of *osd* overall shifted to larger values with  
161 rifampicin treatment compared to the NT case (Figure S5). We fit the distribution of  $\log(\text{osd})$  of  
162 the rifampicin treated case with single Gaussian peak and used the fit parameters (the center and  
163 the width) to constrain the fitting for other Hfq-mMaple3 constructs under different conditions. For  
164 the WT Hfq-mMaple3, in the NT case, about  $95\pm 4\%$  of the population was mRNA-associated,  
165 consistent with previous hypothesis that Hfq proteins are largely occupied in the cell<sup>2,3,37</sup>. Y25D  
166 and K31A mutants had the most compromised mRNA binding ability, with  $33\pm 6\%$  and  $32\pm 4\%$  of  
167 the population was mRNA-associated, respectively (Figure 2d).

168

### 169 ***Hfq is deficient in releasing mRNAs without interactions with RNase E***

170 Hfq has been demonstrated to interact with the C-terminal scaffold region of RNase E<sup>26-28</sup>. To  
171 study whether the interaction with RNase E affects the diffusivity of Hfq, we imaged Hfq-mMaple3  
172 in two RNase E mutant strains. The *rne131* mutant strain has RNase E truncated by the last 477  
173 amino acid residues<sup>49</sup>, therefore, while it maintains its nuclease activity, this mutant cannot  
174 interact with Hfq. The *rneΔ14* mutant has a smaller fraction of the C-terminal scaffold (residues  
175 636-845) deleted, encompassing the Hfq binding region<sup>50</sup>. In both RNase E mutant backgrounds,  
176 the diffusivity of Hfq-mMaple3 became less sensitive to transcription inhibition by rifampicin  
177 compared to the WT *rne* case (Figure 3a and 2c). 40-50% of Hfq-mMaple3 remained mRNA-  
178 associated upon rifampicin treatment in the RNase E mutant backgrounds (Figure 3b). These

179 observations suggest that without the Hfq-RNase E interaction, more mRNAs remain bound to  
180 Hfq, indicating that Hfq may help deliver the associated mRNA to RNase E for degradation.

181

### 182 ***Hfq-RNase E interaction contributes to the degradation of Hfq-associated mRNAs***

183 To further test the hypothesis that Hfq plays a role in the turnover of certain mRNAs, we used  
184 Northern blots to measure the half-lives of selected mRNAs that are known to interact with Hfq in  
185 four backgrounds: (1) WT *hfq-mMaple3* + WT *rne*, (2) WT *hfq-mMaple3* + *rne131* mutant, (3) *hfq*  
186 Y25D-*mMaple3* + WT *rne*, (4) *hfq* Y25D-*mMaple3* + *rne131* mutant (Figures 3c and S6). In  
187 addition to the genetic background of *hfq-mMaple3* and *rne*, we also knocked out the  
188 corresponding sRNA regulators of the selected mRNAs ( $\Delta$ *ryhB* $\Delta$ *fnrS* for *sodB*,  $\Delta$ *cyaR* $\Delta$ *micA* for  
189 *ompX* and  $\Delta$ *ryhB* $\Delta$ *spf* $\Delta$ *rybB* for *sdhC*). In the WT *rne* background, all tested mRNAs (except for  
190 *icd*, to be discussed later) showed an increased half-life in the *hfq* Y25D-*mMaple3* background  
191 compared to WT *hfq-mMaple3* (Figure 3c), suggesting that association with Hfq facilitates the  
192 turnover of these mRNAs. In the *rne131* mutant background, while all mRNAs showed an  
193 increased lifetime of 2 to 7-fold compared to the WT *rne* background, consistent with a  
194 compromised activity in the *rne131* mutant<sup>49</sup>, the difference in the mRNA half-lives between WT  
195 *hfq-mMaple3* and *hfq* Y25D-*mMaple3* backgrounds was largely diminished (Figure 3c). This result  
196 indicates that in the absence of Hfq-RNase E interaction, association with Hfq or not does not  
197 change the mRNA turnover. As a negative control, *icd* mRNA, which does not have a putative  
198 Hfq binding site, exhibited similar half-lives under WT *hfq* and *hfq* Y25D backgrounds (Figure 3c).  
199 These results collectively support that besides the sRNA-mediated pathway, Hfq can regulate  
200 certain mRNAs' half-lives by bringing the mRNAs to RNase E for degradation.

201

### 202 ***sRNAs can displace Hfq from mRNAs in a face-dependent manner***

203



204 We next examined the effect of sRNAs on the diffusivity of Hfq-mMaple3. We induced expression  
205 of different sRNAs , including RyhB, a class I sRNA, ChiX a class II sRNA, and a sRNA that is  
206 less clearly defined between these two classes, SgrS<sup>25</sup>. Whereas overexpression of RyhB or SgrS  
207 did not cause any noticeable changes in the Hfq-mMaple3 diffusivity or mRNA-associated fraction,  
208 overexpression of ChiX dramatically increased its diffusivity and lowered the mRNA-associated  
209 fraction (Figure 4a and b).

210 As described above, the distal face is the primary binding site for mRNAs in the cell (Figure  
211 2c). Since ChiX requires binding at both the proximal and distal faces, we expect the diffusivity of  
212 Hfq to increase after shifting from mRNA-bound Hfq to ChiX-bound Hfq. Due to the relatively small  
213 molecular weight of sRNAs (~50-300 nucleotides in length), sRNA-bound Hfq-mMaple3 has  
214 similar diffusivity as free Hfq-mMaple3. We then checked if ChiX could compete with mRNAs for  
215 binding to Hfq *in vitro* using electrophoretic mobility shift assay (EMSA). A radiolabeled fragment  
216 of *ptsG* mRNA was pre-incubated with purified Hfq protein and then chased with unlabeled ChiX.  
217 Consistent with the *in vivo* results, ChiX can effectively displace *ptsG* from Hfq (Figure 4a and c,  
218 left panel).

219 Overexpression of RyhB or SgrS did not cause any significant changes in the Hfq-mMaple3  
220 diffusivity or the corresponding mRNA-associated fraction (Figure 4a and b). We reasoned that  
221 there might be two possibilities. First, since class I sRNAs bind through the proximal face and the  
222 rim of Hfq, it can bind to the mRNA-free Hfq or co-occupy the mRNA-bound Hfq to generate  
223 sRNA-bound Hfq or sRNA-mRNA-co-bound Hfq, respectively. Second, class I sRNAs cannot  
224 effectively compete against mRNAs for Hfq binding, therefore most Hfq proteins remain  
225 associated with mRNAs. To distinguish these two possibilities, we performed an EMSA  
226 competition assay using RyhB as an example. Results show that RyhB cannot displace the  
227 radiolabeled *ptsG* from Hfq, but rather generates an additional upper-shifted band compared to  
228 the band of *ptsG*-Hfq complex, supporting that RyhB and *ptsG* can co-occupy Hfq (Figure 4c,  
229 right panel). In addition, droplet digital PCR (ddPCR) performed in the same conditions as the

230 diffusivity assays showed that RyhB level was comparable to ChiX (Figure 4d). Since RyhB  
231 stability is highly dependent on association with Hfq<sup>51</sup>, EMSA and ddPCR results suggest that  
232 both *in vitro* and *in vivo*, RyhB can effectively access mRNA-occupied Hfq through co-occupying  
233 Hfq from the proximal face.

234 To summarize, our results collectively suggest that both class I and class II sRNAs can  
235 access mRNA-occupied Hfq *in vivo*. Class I sRNAs can co-occupy the Hfq protein with an mRNA  
236 through different binding sites whereas class II sRNAs can directly compete against the mRNA at  
237 the distal face. Interestingly, fluorescence *in situ* hybridization (FISH) showed a much stronger  
238 signal for RyhB compared to ChiX (Figure S8), even though their levels are similar revealed by  
239 ddPCR (Figure 4d). The weaker hybridization signal for ChiX is very likely a reflection of the larger  
240 protected region by Hfq on both distal and proximal faces, hindering FISH probe binding.

241  
242 ***Class II sRNAs require interaction with the proximal face and a strong AAN motif to***  
243 ***compete for Hfq binding***

244 We next sought to understand the molecular features that make ChiX a strong competitor for Hfq  
245 binding. When overexpressed in the *hfq* Q8A-*mMaple3* background (proximal face mutation),  
246 ChiX lost its capability to displace mRNAs from the mutant Hfq (Figure 5b and c), suggesting that  
247 additional binding affinity provided by the proximal face of Hfq is critical for displacing other RNAs  
248 from the distal face. *E. coli* Hfq prefers a (A-A-N)<sub>n</sub> sequence for distal face binding, where N can  
249 be any nucleotide, and each monomer binds to one A-A-N repeat<sup>18</sup>. ChiX contains four AAN motifs  
250 (Figure 5a). We next determined the effect of AAN motifs on conferring the competitive binding to  
251 Hfq over mRNAs. We generated and overexpressed ChiX mutants with one or two AAN motif(s)  
252 deleted (Figure 5a) and found that the fraction of remaining mRNA-bound Hfq increased when  
253 the number of AAN motifs decreased (Figure 5a and c). Notably, the levels of WT ChiX in the *hfq*  
254 Q8A-*mMaple3* background, and the ChiX mutants in the WT *hfq-mMaple3* background remained

255 similar as the WT ChiX in WT *hfq-mMaple3* background (Figure 4d and 5d), confirming that the  
256 difference we observed in the mutant cases was not due to a change in the cellular ChiX level.

257

## 258 **Discussion**

259 Using single-particle tracking, we resolved different diffusivity states of Hfq proteins in live cells,  
260 reporting on the interactions with different cellular RNAs. Specifically, free Hfq and sRNA-bound  
261 Hfq proteins have the highest diffusivity, and association of mRNAs reduces the diffusivity of Hfq.  
262 Utilizing the different diffusivities of mRNA-associated Hfq and mRNA-free Hfq, we directly  
263 observed the transition of major interaction partners of Hfq in response to changes in cellular  
264 conditions. During exponential growth when sRNAs are least expressed, Hfq proteins are largely  
265 occupied by mRNAs through the distal face. Consistent with *in vitro* binding studies<sup>34–36</sup>,  
266 intracellular interactions between Hfq and the mRNA are fairly stable, as indicated by the  
267 observation that Hfq cannot release the bound mRNA efficiently in the absence of the interaction  
268 with RNase E upon rifampicin treatment. On the other hand, the mRNA binding and RNase E  
269 binding capability of Hfq allows it to serve as a “shuttle” by bringing mRNA to RNase E to promote  
270 turnover of certain Hfq-associated mRNAs in a sRNA-independent manner (Figure 6a).  
271 Therefore, Hfq-RNase E interaction not only regulates the stability of certain Hfq-associated  
272 mRNAs, but also provides one mechanism to recycle Hfq from these mRNAs.

273 Our results suggest that for the selected mRNAs, Hfq can regulate their turnover through a  
274 direct recruitment of RNase E. Mechanisms of sRNA-independent Hfq-mediated regulation on  
275 mRNA turnover have been reported. First, binding Hfq, or Hfq in complex with other proteins  
276 such as Crc, at the ribosome binding site of the mRNA can repress translation<sup>6–8</sup>, therefore  
277 indirectly increasing the mRNA degradation due to de-protection of the translating ribosomes  
278 against RNase E. Since this translation-dependent regulation of Hfq does not require Hfq-RNase  
279 E interaction, if this mechanism applied to the mRNAs we tested, we would expect the difference  
280 in half-life between the cases of WT *hfq* and *hfq* Y25D to be similar in the WT *rne* and *rne131*

281 backgrounds. The observation that the difference in half-life due to Hfq binding is eliminated in  
282 the *me131* background suggests the turnover of these mRNAs is not through regulation at the  
283 translation level. Second, binding Hfq may recruit polyA polymerase (PAP) and polynucleotide  
284 phosphorylase (PNPase) to stimulate polyadenylation at the 3' end, and therefore promote  
285 degradation<sup>9,10</sup>, an action that may also require interactions with the C-terminal scaffold region of  
286 RNase E. However, this mechanism also cannot fully explain our results for three reasons: (1)  
287 Previous studies suggested that Hfq-stimulated polyadenylation prefers Hfq binding at the 3'  
288 termini of mRNAs containing Rho-independent transcription terminator<sup>10</sup>. However, in our  
289 selected mRNAs, they do not all utilize Rho-independent termination. (2) The Y25D mutant is  
290 more likely to hinder mRNA binding through AAN motif on the distal face, rather than through  
291 polyU stretch in the Rho-independent terminator, assuming binding of Hfq to the Rho-independent  
292 terminator would most likely be through interactions of between the polyU tail and the proximal  
293 face. (3) Our imaging results on Hfq mutants suggest that Hfq binds mRNA mostly through the  
294 distal face, indicating that the population of mRNAs with Hfq binding at a Rho-independent  
295 terminator would only be a minor fraction, highly consistent with the CLIP-seq results of Hfq<sup>14</sup>.  
296 Therefore, it is more likely that the regulation for the selected mRNAs is through direct recruitment  
297 of RNase E rather than through Hfq-stimulated polyadenylation mechanism. Nevertheless, Hfq  
298 can potentially regulate mRNA turnover through a combination of these three mechanisms in a  
299 gene-specific manner.

300 Under the conditions when a specific sRNA is highly induced, we demonstrate how the  
301 sRNA can quickly gain access to mRNA pre-occupied Hfq proteins (Figure 6b). Our results are  
302 reminiscent of a previously proposed model of Hfq interacting with sRNAs and mRNAs in a face-  
303 dependent manner<sup>25</sup>. While the distal face of Hfq is the primary binding site for cellular mRNAs,  
304 the rim has a minor binding role, suggesting that the majority of the Hfq-bound mRNAs are class  
305 I mRNAs, and a minority are class II mRNAs. This observation is consistent with the previous

306 findings that most of the sRNAs are class I sRNAs<sup>25</sup>. Both classes of sRNAs can easily access  
307 Hfq upon induction, albeit with different mechanisms. Surprisingly, class I sRNAs can directly co-  
308 occupy Hfq through the binding faces that are non-overlapping with the class I mRNA binding  
309 face, without the need to displace the pre-occupied mRNA. In contrast, class II sRNAs, such as  
310 ChiX, can either co-occupy the minor fraction of Hfq associated with the class II mRNA at the rim,  
311 or more likely, can effectively displace class I mRNAs from the distal face. In both cases, the  
312 mRNA-occupied Hfq proteins are in standby mode for sRNA binding if needed. The displacement  
313 of mRNA by the class II sRNA requires both the interactions at the proximal face of Hfq and higher  
314 AAN motif number to outcompete mRNAs for the binding at the distal face. In addition, we propose  
315 that the competitive binding by the class II sRNA is likely to occur stepwise, with binding at the  
316 proximal face happening first, followed by the displacement of mRNA from the distal face, which  
317 is supported by the observation that with the Hfq proximal face mutation, ChiX cannot displace  
318 mRNAs, even with a strong AAN motif. Importantly, our mutational work demonstrates that it  
319 should be possible to engineer Hfq-RNA interactions *in vivo*. Given the complete absence of  
320 sRNA-mediated gene regulation in eukaryotes, our results provide a framework for developing  
321 biotechnological tools that will potentially enable precise control over the sequestration,  
322 degradation, and/or expression of target mRNAs in eukaryotes.

323

## 324 **Methods**

### 325 ***Bacterial Strains***

326 Transfer of the Linker-mMaple3-Kan sequence at the 3' end of chromosomal *hfq* gene was  
327 achieved by following the PCR-based method<sup>52</sup> with a few modifications. First, a PCR (PCR1)  
328 was performed using plasmid pZEA93M as template to amplify the mMaple3 sequence (oligos  
329 EM4314-4293). Then, to add sequence homology of *hfq* gene, a second PCR (PCR2) was  
330 performed using PCR1 as template (oligos EM4313-4293). The final PCR product (PCR3),

331 containing a flippase recognition target (FRT)-flanked kanamycin resistance cassette was  
332 generated from pKD4 plasmid with primers PCR2 and EM1690 carrying extensions homologous  
333 to the *hfq* gene. PCR3 was then purified and transformed to WT (EM1055), *hfq* Y25D (KK2562),  
334 *hfq* Q8A (KK2560), *hfq* K31A (AZZ41) or *hfq* R16A (KK2561) strains containing the pKD46  
335 plasmid using electroporation, to obtain strains with *hfq*-Linker-mMaple3-Kan, *hfq* Y25D-Linker-  
336 mMaple3-Kan, *hfq* Q8A-Linker-mMaple3-Kan, *hfq* K31A-Linker-mMaple3-Kan, and *hfq* R16A-  
337 Linker-mMaple3-Kan, respectively. Hfq mutations F42A and R19D were obtained by performing  
338 PCRs on fusion strains KP1867 (Hfq-linker-mMaple3) with oligos EM4704-1690 (Hfq F42A) or  
339 EM4705-1690 (Hfq R19D). Fragments were then transformed to WT (EM1055) containing the  
340 pKD46 plasmid, following induction of the  $\lambda$  Red. P1 transduction was used to transfer the linked  
341 fluorescent protein and the antibiotic resistance gene into a WT (EM1055), *rne131* (EM1377) or  
342 *rne* $\Delta$ 14 (EM1376) strains.

343 *fnrS*, *micA* and *spf* knock-outs were obtained through transformation of PCR products into  
344 EM1237 after induction of  $\lambda$  *red* and selecting for kanamycin or chloramphenicol resistance. P1  
345 transduction was used to transfer the knock-out mutations and the antibiotic resistance gene into  
346 appropriate strains. Selection was achieved with kanamycin or chloramphenicol. When  
347 necessary, FRT-flanked antibiotic resistance cassettes were eliminated after transformation with  
348 pCP20, as described<sup>52</sup>. All constructs were verified by sequencing and are listed in Table S1.  
349 Oligonucleotides used for generating constructs are listed in Table S2.

350

### 351 **Plasmids**

352 *E. coli* MG1655 sRNA genes *sgrS*, *ryhB*, and *chiX* were inserted into the pET15b low copy number  
353 vector plasmid (kind gift from Perozo lab) to create plasmids pET16b-RyhB, pET15b-SgrS and  
354 pET15b-ChiX using Gibson Assembly (in house) using oligos listed in Table S2. The *chiX*  $\Delta$ AAN  
355 mutants were made using site directed mutagenesis. Primers EH159, EH160 and EH161

356 homologous to *chiX* while excluding the AAN domain were used to amplify the plasmid. The  
357 products were phosphorylated (NEB M0201S) and ligated (NEB M0202S) before transformation.

358 Cloning of pBAD-*micA* was performed by PCR amplification of *micA* (oligos EM2651-2652)  
359 on WT strain (EM1055). The PCR product was digested with SphI and cloned into a pNM12 vector  
360 digested with MscI and SphI. All constructs were verified by sequencing and are listed in Table  
361 S1. Oligos used for generating the constructs are listed in Table S2.

362

### 363 ***Growth conditions for imaging experiments***

364 Overnight cultures of *E. coli* strains were diluted by 1:100 in MOPS EZ rich defined medium  
365 (Teknova). 0.2% glucose was used as the carbon source for imaging Hfq-mMaple3 WT and  
366 mutants under NT and rifampicin treated conditions. 0.2% glycerol was used as the carbon source  
367 with 100 µg/mL ampicillin for mMaple3 control (SP191). 0.2% fructose was used as the carbon  
368 source with 100 µg/mL ampicillin for cases with sRNA overexpression. Cultures were grown at  
369 37 °C aerobically. Plasmid-encoded sRNAs and plasmid-encoded mMaple3 proteins were  
370 induced by IPTG (1 mM and 100~400 µM respectively) when the OD<sub>600</sub> of the cell culture was  
371 ~0.1. Induced cells were grown for ~45 minutes before imaging. For the rifampicin treatment,  
372 rifampicin was added to a final concentration of 200 µg/mL when the OD<sub>600</sub> of the cell culture was  
373 ~0.2, and the cells were incubated for 15 minutes before imaging.

374

### 375 ***Growth curve measurement***

376 The bacterial strains were grown overnight in LB or MOPS EZ-rich medium containing 0.2%  
377 glucose. Cultures were diluted to 6 x 10<sup>6</sup> cells/mL in their respective medium and samples were  
378 prepared in triplicate by mixing 50 µL of cells and 50 µL of fresh media to obtain 3 x 10<sup>6</sup> cells/mL.  
379 Assay were performed in Microtest plate, 96-well, flat base, polystyrene, sterile (Sarstedt) and  
380 growth was monitored using Epoch 2 Microplate Spectrophotometer reader (BioTek) with the



381 following settings: OD= 600 nm, Temperature= 37 °C, Reading= every 10 min for 22 h,  
382 Continuous shaking.

383

#### 384 ***RNA extraction and Northern blot analysis***

385 Total RNA was extracted following the hot-phenol protocol as described<sup>53</sup>. To test the function of  
386 the mMaple3-tagged Hfq and compare that with the WT Hfq, cells were grown in LB to the OD<sub>600</sub>  
387 of 0.5 and either RyhB was induced by adding of 2.2'-dipyridyl in a WT *hfq* or in an *hfq-mMaple3*  
388 background, or MicA was induced by addition of 0.1% arabinose (*ara*) in a  $\Delta micA$  WT *hfq* or in a  
389  $\Delta micA$  *hfq-mMaple3* background (pBAD-*micA*).

390 Determination of RNA half-life was performed in MOPS EZ rich defined medium (Teknova)  
391 with 0.2% glucose by addition of 500 µg/mL rifampicin to the culture at the OD<sub>600</sub> of 0.5 before  
392 total RNA extraction. Northern blots were performed as described previously<sup>54</sup> with some  
393 modifications. Following total RNA extraction, 5~10 µg of total RNA was loaded on polyacrylamide  
394 gel (5% acrylamide 29:1, 8 M urea) and 20 µg was loaded on agarose gel (1%, 1X MOPS).  
395 Radiolabeled DNA and RNA probes used in this study are described in Table S2. The radiolabeled  
396 RNA probes used for Northern blot analysis were transcribed with T7 RNA polymerase from a  
397 PCR product to generate the antisense transcript of the gene of interest<sup>55</sup>. Membranes were then  
398 exposed to phosphor storage screens and analyzed using a Typhoon Trio (GE Healthcare)  
399 instrument. Quantification was performed using the Image studio lite software (LI-COR).

400 The decay rate of mRNA degradation was calculated as previously described<sup>56</sup>. Briefly, the  
401 intensity of Northern blot at each time point upon adding rifampicin was normalized to the intensity  
402 at time zero, and was fit by a piecewise function in the log space:

$$403 \ln I(t) = \begin{cases} \ln I(0), & t \leq \alpha \\ \ln I(0) - k(t - \alpha), & t > \alpha \end{cases}$$



404 Where  $I(t)$  is the normalized intensity at time  $t$ ,  $I(0)$  is the normalized intensity at time zero,  $k$  is  
405 the rate of exponential decay and  $\alpha$  is the duration of the initial delay before the exponential decay  
406 begins. The reported half-lives ( $\tau$ ) is calculated by  $\tau = \log(2)/k$ .

407

#### 408 ***Droplet Digital PCR***

409 Droplet Digital PCR (ddPCR) was performed on total RNA extracted following the hot-phenol  
410 protocol<sup>53</sup> from cells grown in MOPS EZ rich defined medium containing 0.2% fructose (Teknova)  
411 with 50  $\mu\text{g}/\text{mL}$  ampicillin. 1mM IPTG was added at  $\text{OD}_{600}=0.1$  for 1 h before total RNA extraction.  
412 Samples were treated with 8 U Turbo DNase (Ambion) for 1 h. RNA integrity was assessed with  
413 an Agilent 2100 Bioanalyzer (Agilent Technologies). Reverse transcription was performed on 1.5  
414  $\mu\text{g}$  total RNA with Transcriptor reverse transcriptase, random hexamers, dNTPs (Roche  
415 Diagnostics), and 10 U of RNase OUT (Invitrogen) following the manufacturer's protocol in a total  
416 volume of 10  $\mu\text{L}$ .

417 Droplet Digital PCR (ddPCR) reactions were composed of 10  $\mu\text{L}$  of 2X QX200 ddPCR  
418 EvaGreen Supermix (Bio-Rad), 10 ng (3  $\mu\text{L}$ ) cDNA, 100 nM final (2  $\mu\text{L}$ ) primer pair solutions and  
419 5  $\mu\text{L}$  molecular grade sterile water (Wisent) for a 20  $\mu\text{L}$  total reaction. Primers are listed in Table  
420 S2. Each reaction mix (20  $\mu\text{L}$ ) was converted to droplets with the QX200 droplet generator (Bio-  
421 Rad). Droplet-partitioned samples were then transferred to a 96-well plate, sealed and cycled in  
422 a C1000 deep well Thermocycler (Bio-Rad) under the following cycling protocol: 95 °C for 5 min  
423 (DNA polymerase activation), followed by 50 cycles of 95 °C for 30 s (denaturation), 59 °C for 1  
424 min (annealing) and 72 °C for 30 s (extension) followed by post-cycling steps of 4 °C for 5 min  
425 and 90 °C for 5 min (Signal stabilization) and an infinite 12 °C hold. The cycled plate was then  
426 transferred and read using the QX200 reader (Bio-Rad) either the same or the following day post-  
427 cycling. The concentration reported is copies/ $\mu\text{L}$  of the final 1x ddPCR reaction (using QuantaSoft  
428 software from Bio-Rad)<sup>57</sup>.

429

430 ***Hfq purification***

431 Hfq was purified following the previously described procedure<sup>58</sup> with modifications. Briefly, strain  
432 EM1392 containing pET21b-*hfq* was grown at 37 °C in LB medium supplemented with 50 µg/mL  
433 ampicillin and 30 µg/mL chloramphenicol until it reached an OD<sub>600</sub>=0.6. Hfq expression was  
434 induced by addition of 5 mM IPTG (Bioshop) for 3 h. Cells were pelleted by centrifugation (15 min,  
435 3825g) and resuspended in 4 mL Buffer C (50 mM Tris-HCl pH 7.5, 1 mM EDTA, 50 mM NH<sub>4</sub>Cl,  
436 5% glycerol)<sup>59</sup> supplemented with 30 U Turbo DNase (Ambion). Cells were lysed by sonication  
437 for 4 min (amplitude 25%, cycles of 5 sec sonication, 5 sec on ice) and samples were cleared by  
438 centrifugation (45 min, 12,000g). The supernatant was incubated at 80 °C for 10 min, centrifuged  
439 again (20 min, 12,000g) and cleared by filtration.

440 The protein extract was loaded onto a 1 mL HiTRAP Heparin column HP (GE Healthcare  
441 Life Sciences, 17-0406-01) equilibrated with Buffer A (50 mM Tris-HCl pH 8.0, 50 mM NaCl, 50  
442 mM KCl, 1 mM EDTA, 5% glycerol). After washes, the protein was eluted with a linear NaCl  
443 gradient (0.05 M – 1 M NaCl) in Buffer A. Fraction samples were loaded on SDS-PAGE and  
444 stained with Coomassie-Blue. Hfq-containing fractions were dialyzed against a dialysis buffer (50  
445 mM Tris-Cl pH 7.5, 1 mM EDTA pH 8.0, 5% Glycerol, 0.25 M NH<sub>4</sub>Cl). Glycerol concentration was  
446 brought up to 10% and protein content was quantified by BCA assay (Thermo Scientific™).

447

448 ***EMSA***

449 DNA templates containing a T7 promoter were synthesized by PCR amplification on genomic  
450 DNA using oligonucleotides EM88-EM1978 (T7-*ryhB*), T7-ChiX(F)-T7-ChiX(R) (T7-*chiX*) or T7-  
451 ptsG(F)-T7-ptsG(R) (T7-*ptsG*). Briefly, templates were incubated for 4 h at 37 °C in RNA  
452 Transcription Buffer (80 mM HEPES-KOH pH 7.5, 24 mM MgCl<sub>2</sub>, 40 mM DTT, 2 mM spermidine)  
453 in the presence of 5 mM NTP, 40 U porcine RNase Inhibitor (in house), 1 µg pyrophosphatase  
454 (Roche) and 10 µg purified T7 RNA polymerase (in house). Samples were treated with 2 U Turbo  
455 DNase (Ambion) and purified on polyacrylamide gel (6% acrylamide:bisacrylamide 19:1, 8 M

456 urea). When necessary, transcripts were dephosphorylated using 10 U Calf Intestinal  
457 Phosphatase (NEB) and were 5' end-radiolabeled with [ $\gamma$ - $^{32}$ P]-ATP using 10 U T4 polynucleotide  
458 kinase (NEB). Radiolabeled transcripts were purified on polyacrylamide gel (6%  
459 acrylamide:bisacrylamide 19:1, 8 M urea).

460 EMSA were performed as previously described<sup>60</sup>. To determine binding affinity of Hfq to  
461 RyhB, ChiX and *ptsG*, radiolabeled RNA was heated for 1 min at 90 °C and put on ice for 1 min.  
462 RNA was diluted to 20 nM in modified Binding Buffer 2 (10 nM Tris-HCl pH 8.0, 1 mM DTT, 1 mM  
463 MgCl<sub>2</sub>, 20 mM KCl, 10 mM Na<sub>2</sub>HPO<sub>4</sub>-NaH<sub>2</sub>PO<sub>4</sub> pH 8.0, 12.5 μg/mL yeast tRNA) and mixed with  
464 specific concentrations of Hfq (0-200 nM). Samples were incubated for 15 min at 37 °C and  
465 reactions were stopped by addition of 1 μL of non-denaturing loading buffer (1X TBE, 50%  
466 glycerol, 0.1% bromophenol blue, 0.1% xylene cyanol). For competition assays, 20 nM of  
467 radiolabeled *ptsG* was first incubated for 15 min at 37 °C with 100 nM Hfq (as described above).  
468 Specific concentrations of RyhB or ChiX (0-100 nM) were added to the samples and incubation  
469 was carried out for 15 min at 37 °C. Reactions were stopped by addition of 1 μL non-denaturing  
470 loading buffer. Samples were loaded on native polyacrylamide gels (5% acrylamide:bisacrylamide  
471 29:1) in cold TBE 1X and migrated at 50 V, at 4 °C. Gels were dried and exposed to phosphor  
472 storage screens and analyzed using a Typhoon Trio (GE Healthcare) instrument. When  
473 applicable, quantification was performed using the Image studio lite software (LI-COR) and data  
474 was fitted using non-linear regression (GraphPad Prism).

475

#### 476 ***Fluorescence in situ hybridization (FISH)***

477 Sample preparation for fixed cells was performed mostly according to the protocol previously  
478 reported<sup>61,62</sup>. Briefly, ~10 mL of cells was collected and fixed with 4% formaldehyde in 1x PBS for  
479 30 minutes at room temperature (RT). The fixed cells were then permeabilized with 70% ethanol  
480 for 1 hour at RT. Permeabilized cells can be stored in 70% ethanol at 4 °C until the sample  
481 preparation. FISH probes were designed and dye-labeled as in the previous report<sup>61,62</sup>.

482 Hybridization was performed in 20  $\mu$ L of hybridization buffer (10% dextran sulfate (Sigma D8906)  
483 and 10% formamide in 2x SSC) containing specific sets of FISH probes at 30 °C in the dark  
484 overnight. The concentration of FISH probes was 50 nM. After hybridization, cells were washed  
485 three times with 10% FISH wash buffer (10% formamide in 2x SSC) at 30 °C..

486

#### 487 ***Live-cell single-particle tracking and fixed cell SMLM imaging***

488 Imaging was performed on a custom built microscopy setup previously described<sup>63</sup>. Briefly, an  
489 inverted optical microscope (Nikon Ti-E with 100x NA 1.49 CFI HP TIRF oil immersion objective)  
490 was fiber-coupled with a 647 nm laser (Cobolt 06-01), a 561 nm laser (Coherent Obis LS) and a  
491 405 nm laser (Crystalaser). A common dichroic mirror (Chroma zt405/488/561/647/752r-UF3)  
492 was used for all lasers, but different emission filters were used for different fluorophores (Chroma  
493 ET700/75M for Alexa Fluor 647 and Chroma ET595/50M for mMaple3). For imaging Hoechst dye,  
494 a LED lamp (X-Cite 120LED) was coupled with a filter cube (Chroma 49000). The emission signal  
495 was captured by an EMCCD camera (Andor iXon Ultra 888) with slits (Cairn OptoSplit III),  
496 enabling fast frame rates by cropping the imaging region. During imaging acquisition, the Z-drift  
497 was prevented in real time by a built-in focus lock system (Nikon Perfect Focus).

498 For live-cell single particle tracking, 1 mL of cell culture was centrifuged by 1,500g for 5 min  
499 and 970  $\mu$ L of the supernatant was removed. The remaining volume was mixed well and ~1.5  $\mu$ L  
500 was covered by a thin piece of 1% agarose gel on an ethanol-cleaned-and-flamed coverslip  
501 sealed to a custom 3D printed chamber. The agarose gel contained the same concentration of  
502 any drug or inducer used in each condition. Exceptions include rifampicin, which was at 100  
503  $\mu$ g/mL in the gel, due to high imaging background caused by high concentration of rifampicin, and  
504 IPTG for SP191 culture, which was eliminated in the gel, due to the high abundance mMaple3  
505 already induced by IPTG in the culture. The power density of the 561 nm laser for single-particle  
506 tracking was ~2750 W/cm<sup>2</sup>, and the power density of the 405 nm laser was ~7 W/cm<sup>2</sup> (except for  
507 SP191 where ~4.5 W/cm<sup>2</sup> was used due to high abundance of mMaple3). 1.5x Tube lens was

508 used for the microscope body, and 2x2 binning mode was used for the camera. In this way, the  
509 effective pixel size became larger (173 nm instead of original 130 nm), receiving 77% more  
510 photons per pixel. 10 frames with 561 nm excitation were taken after each frame of 405 nm photo-  
511 conversion. About 13000 frames were collected per movie at a rate of 180 frames per second.  
512 For fixed-cell control experiment for tracking parameter optimization, imaging was performed  
513 using the exactly same imaging parameters as in live-cell measurements for a fair comparison.  
514 In cases imaging DNA together, Hoechst dye (Thermo 62249) was added to the ~30  $\mu$ L of cell  
515 culture before imaging as ~20  $\mu$ M final concentration, and imaged by the LED lamp (12%) with  
516 500 ms exposure time. Imaging acquisition was conducted by NIS-Element (Nikon) software, at  
517 RT.

518

### 519 ***Image reconstruction***

520 The SMLM images are reconstructed as previously described<sup>62</sup>, by a custom code written in IDL  
521 (Interactive Data Language). Briefly, all the pixels with an intensity value above the threshold were  
522 identified in each frame. The threshold was set at 3 times of the standard deviation of the  
523 individual frame pixel intensity. Among those pixels, the ones having larger values than  
524 surrounding pixels in each 5x5 pixel region are identified again as possible peak candidates, and  
525 2D Gaussian function was fitted to a 15x15 pixel region surrounding these candidates. Candidates  
526 with failed fitting were discarded, and precise peak positions are defined for the remaining ones.  
527 The horizontal drift, which often occurs during the imaging acquisition, was corrected by fast  
528 Fourier transformation analysis.

529

### 530 ***Tracking analysis***

531 We used a MATLAB coded tracking algorithm to generate diffusion trajectories, which was  
532 modified by Sadoon and Yong<sup>64</sup> based on the previously developed code<sup>65</sup>. Per each time step  
533 of ~5.6 ms, 250 nm was empirically chosen to be the maximum one-step displacement to reduce

534 artificial diffusion trajectories connected between different molecules, using a fixed cell sample as  
535 a control (Figure S3B). Trajectories longer than 5 time steps were used to calculate effective  
536 diffusion coefficient (D). Mean square displacement (MSD) as a function of time lag ( $\Delta t$ ) was fit  
537 with a power law function ( $MSD = D(\Delta t)^\alpha$ ). D values are reported in related figures. For one step  
538 displacement (*osd*) fitting, trajectories longer than 3 time steps were used, to populate many  
539 single *osd* values for fitting.

540

#### 541 **Enrichment calculation**

542 Enrichment at a certain region (nucleoid or cytoplasm) of a cell is defined as following.

$$543 \frac{(\# \text{ of localizations in the region}) / (\text{total \# of localizations in the cell})}{(\text{area of the region}) / (\text{total area of the cell})}$$

544 Here the 'area' of a cell refers to the two-dimensional area of the cell from the differential  
545 interference contrast (DIC) image (for the total area) or from the Hoechst image (for the nucleoid  
546 area), detected and calculated by our custom Matlab code<sup>66</sup>. "Cytoplasm" area/region is defined  
547 as the total region minus the nucleoid.

548

#### 549 **Acknowledgements**

550 We thank C.K. Vanderpool and X. Ma for sharing the plasmid containing mMaple3 template, E.  
551 Perozo for sharing the plasmid containing Lac repressor and operator system, Y. Wang for  
552 sharing MATLAB codes for extracting tracking trajectories, and the MRSEC Shared User Facilities  
553 at the University of Chicago (NSF DMR-1420709). We thank the Service de Purification de  
554 Protéines de l'Université de Sherbrooke (SPP) for Hfq purification and the Plateforme RNomique  
555 de l'Université de Sherbrooke for ddPCR. J. Fei acknowledges the support by the Searle Scholars  
556 Program, and NIH Director's New Innovator Award (1DP2GM128185-01). Work in E. Massé Lab  
557 has been supported by an operating grant MOP69005 from the Canadian Institutes of Health  
558 Research (CIHR) and NIH Team Grant R01 GM092830-06A1.

559

## 560 **Author Contributions**

561 J.F. conceived the project. J.F. and E.M designed the experiments. S.P., K.P. E.M.H. and M.C.C  
562 conducted the experiments, S.P., M.A.R., W.L. and J.F. analyzed the data, S.P. and J.F.  
563 interpreted the data, J.F. and E.M. wrote the manuscript.

564

## 565 **Competing Interests**

566 The authors declare no competing interests.

567

## 568 **References**

- 569 1. Brennan, R. G. & Link, T. M. Hfq structure, function and ligand binding. *Curr Opin Microbiol*  
570 10, 125–133 (2007).
- 571 2. Vogel, J. & Luisi, B. F. Hfq and its constellation of RNA. *Nat Rev Microbiol* 9, 578–589  
572 (2011).
- 573 3. Updegrave, T. B., Zhang, A. & Storz, G. Hfq: the flexible RNA matchmaker. *Curr Opin*  
574 *Microbiol* 30, 133–138 (2016).
- 575 4. Storz, G., Vogel, J. & Wassarman, K. M. Regulation by small RNAs in bacteria: expanding  
576 frontiers. *Mol Cell* 43, 880–891 (2011).
- 577 5. Wagner, E. G. H. & Romby, P. Small RNAs in bacteria and archaea: who they are, what  
578 they do, and how they do it. *Adv Genet* 90, 133–208 (2015).
- 579 6. Urban, J. H. & Vogel, J. Two seemingly homologous noncoding RNAs act hierarchically to  
580 activate glmS mRNA translation. *PLoS Biol* 6, e64 (2008).
- 581 7. Vytvytska, O., Moll, I., Kabardin, V. R., von Gabain, A. & Bläsi, U. Hfq (HF1) stimulates  
582 ompA mRNA decay by interfering with ribosome binding. *Genes Dev* 14, 1109–1118  
583 (2000).
- 584 8. Pei, X. Y. *et al.* Architectural principles for Hfq/Crc-mediated regulation of gene expression.  
585 *elife* 8, (2019).
- 586 9. Hajnsdorf, E. & Régnier, P. Host factor Hfq of Escherichia coli stimulates elongation of  
587 poly(A) tails by poly(A) polymerase I. *Proc Natl Acad Sci U S A* 97, 1501–1505 (2000).
- 588 10. Mohanty, B. K., Maples, V. F. & Kushner, S. R. The Sm-like protein Hfq regulates  
589 polyadenylation dependent mRNA decay in Escherichia coli. *Mol Microbiol* 54, 905–920  
590 (2004).
- 591 11. Sobrero, P. & Valverde, C. The bacterial protein Hfq: much more than a mere RNA-binding  
592 factor. *Crit Rev Microbiol* 38, 276–299 (2012).
- 593 12. Tsui, H. C., Leung, H. C. & Winkler, M. E. Characterization of broadly pleiotropic  
594 phenotypes caused by an hfq insertion mutation in Escherichia coli K-12. *Mol Microbiol* 13,  
595 35–49 (1994).



- 596 13. Sittka, A. *et al.* Deep sequencing analysis of small noncoding RNA and mRNA targets of  
597 the global post-transcriptional regulator, Hfq. *PLoS Genet* 4, e1000163 (2008).
- 598 14. Tree, J. J., Granneman, S., McAteer, S. P., Tollervey, D. & Gally, D. L. Identification of  
599 bacteriophage-encoded anti-sRNAs in pathogenic *Escherichia coli*. *Mol Cell* 55, 199–213  
600 (2014).
- 601 15. Chao, Y., Papenfort, K., Reinhardt, R., Sharma, C. M. & Vogel, J. An atlas of Hfq-bound  
602 transcripts reveals 3' UTRs as a genomic reservoir of regulatory small RNAs. *EMBO J* 31,  
603 4005–4019 (2012).
- 604 16. Horstmann, N., Orans, J., Valentin-Hansen, P., Shelburne, S. A. & Brennan, R. G.  
605 Structural mechanism of *Staphylococcus aureus* Hfq binding to an RNA A-tract. *Nucleic*  
606 *Acids Res* 40, 11023–11035 (2012).
- 607 17. Link, T. M., Valentin-Hansen, P. & Brennan, R. G. Structure of *Escherichia coli* Hfq bound  
608 to polyriboadenylate RNA. *Proc Natl Acad Sci U S A* 106, 19292–19297 (2009).
- 609 18. Robinson, K. E., Orans, J., Kovach, A. R., Link, T. M. & Brennan, R. G. Mapping Hfq-RNA  
610 interaction surfaces using tryptophan fluorescence quenching. *Nucleic Acids Res* 42, 2736–  
611 2749 (2014).
- 612 19. Salim, N. N., Faner, M. A., Philip, J. A. & Feig, A. L. Requirement of upstream Hfq-binding  
613 (ARN)x elements in *glmS* and the Hfq C-terminal region for *GlmS* upregulation by sRNAs  
614 *GlmZ* and *GlmY*. *Nucleic Acids Res* 40, 8021–8032 (2012).
- 615 20. Someya, T. *et al.* Crystal structure of Hfq from *Bacillus subtilis* in complex with SELEX-  
616 derived RNA aptamer: insight into RNA-binding properties of bacterial Hfq. *Nucleic Acids*  
617 *Res* 40, 1856–1867 (2012).
- 618 21. Dimastrogiovanni, D. *et al.* Recognition of the small regulatory RNA *RydC* by the bacterial  
619 Hfq protein. *elife* 3, (2014).
- 620 22. Murina, V., Lekontseva, N. & Nikulin, A. Hfq binds ribonucleotides in three different RNA-  
621 binding sites. *Acta Crystallogr D Biol Crystallogr* 69, 1504–1513 (2013).
- 622 23. Peng, Y., Curtis, J. E., Fang, X. & Woodson, S. A. Structural model of an mRNA in complex  
623 with the bacterial chaperone Hfq. *Proc Natl Acad Sci U S A* 111, 17134–17139 (2014).
- 624 24. Santiago-Frangos, A., Kavita, K., Schu, D. J., Gottesman, S. & Woodson, S. A. C-terminal  
625 domain of the RNA chaperone Hfq drives sRNA competition and release of target RNA.  
626 *Proc Natl Acad Sci U S A* 113, E6089–E6096 (2016).
- 627 25. Schu, D. J., Zhang, A., Gottesman, S. & Storz, G. Alternative Hfq-sRNA interaction modes  
628 dictate alternative mRNA recognition. *EMBO J* 34, 2557–2573 (2015).
- 629 26. Bruce, H. A. *et al.* Analysis of the natively unstructured RNA/protein-recognition core in the  
630 *Escherichia coli* RNA degradosome and its interactions with regulatory RNA/Hfq  
631 complexes. *Nucleic Acids Res* 46, 387–402 (2018).
- 632 27. Ikeda, Y., Yagi, M., Morita, T. & Aiba, H. Hfq binding at *RhIB*-recognition region of RNase E  
633 is crucial for the rapid degradation of target mRNAs mediated by sRNAs in *Escherichia coli*.  
634 *Mol Microbiol* 79, 419–432 (2011).
- 635 28. Morita, T., Maki, K. & Aiba, H. RNase E-based ribonucleoprotein complexes: mechanical  
636 basis of mRNA destabilization mediated by bacterial noncoding RNAs. *Genes Dev* 19,  
637 2176–2186 (2005).



- 638 29. Afonyushkin, T., Vecerek, B., Moll, I., Bläsi, U. & Kaberdin, V. R. Both RNase E and RNase  
639 III control the stability of *sodB* mRNA upon translational inhibition by the small regulatory  
640 RNA RyhB. *Nucleic Acids Res* 33, 1678–1689 (2005).
- 641 30. Pfeiffer, V., Papenfort, K., Lucchini, S., Hinton, J. C. & Vogel, J. Coding sequence targeting  
642 by MicC RNA reveals bacterial mRNA silencing downstream of translational initiation. *Nat*  
643 *Struct Mol Biol* 16, 840–846 (2009).
- 644 31. Prévost, K., Desnoyers, G., Jacques, J. F., Lavoie, F. & Massé, E. Small RNA-induced  
645 mRNA degradation achieved through both translation block and activated cleavage. *Genes*  
646 *Dev* 25, 385–396 (2011).
- 647 32. Ali Azam, T., Iwata, A., Nishimura, A., Ueda, S. & Ishihama, A. Growth phase-dependent  
648 variation in protein composition of the *Escherichia coli* nucleoid. *J Bacteriol* 181, 6361–6370  
649 (1999).
- 650 33. Kajitani, M., Kato, A., Wada, A., Inokuchi, Y. & Ishihama, A. Regulation of the *Escherichia*  
651 *coli* *hfq* gene encoding the host factor for phage Q beta. *J Bacteriol* 176, 531–534 (1994).
- 652 34. Fender, A., Elf, J., Hampel, K., Zimmermann, B. & Wagner, E. G. RNAs actively cycle on  
653 the Sm-like protein Hfq. *Genes Dev* 24, 2621–2626 (2010).
- 654 35. Olejniczak, M. Despite similar binding to the Hfq protein regulatory RNAs widely differ in  
655 their competition performance. *Biochemistry* 50, 4427–4440 (2011).
- 656 36. Salim, N. N. & Feig, A. L. An upstream Hfq binding site in the *fhlA* mRNA leader region  
657 facilitates the OxyS-*fhlA* interaction. *PLoS ONE* 5, (2010).
- 658 37. Wagner, E. G. Cycling of RNAs on Hfq. *RNA Biol* 10, 619–626 (2013).
- 659 38. Manley, S. *et al.* High-density mapping of single-molecule trajectories with photoactivated  
660 localization microscopy. *Nat Methods* 5, 155–157 (2008).
- 661 39. Wang, S., Moffitt, J. R., Dempsey, G. T., Xie, X. S. & Zhuang, X. Characterization and  
662 development of photoactivatable fluorescent proteins for single-molecule-based  
663 superresolution imaging. *Proc Natl Acad Sci U S A* 111, 8452–8457 (2014).
- 664 40. Persson, F., Lindén, M., Unoson, C. & Elf, J. Extracting intracellular diffusive states and  
665 transition rates from single-molecule tracking data. *Nat Methods* 10, 265–269 (2013).
- 666 41. Taghbalout, A., Yang, Q. & Arluison, V. The *Escherichia coli* RNA processing and  
667 degradation machinery is compartmentalized within an organized cellular network. *Biochem*  
668 *J* 458, 11–22 (2014).
- 669 42. Diestra, E., Cayrol, B., Arluison, V. & Risco, C. Cellular electron microscopy imaging  
670 reveals the localization of the Hfq protein close to the bacterial membrane. *PLoS ONE* 4,  
671 e8301 (2009).
- 672 43. Kannaiah, S., Livny, J. & Amster-Choder, O. Spatiotemporal organization of the *e. coli*  
673 transcriptome: translation independence and engagement in regulation. *Mol Cell* 76, 574–  
674 589.e7 (2019).
- 675 44. Zhang, A., Schu, D. J., Tjaden, B. C., Storz, G. & Gottesman, S. Mutations in interaction  
676 surfaces differentially impact *E. coli* Hfq association with small RNAs and their mRNA  
677 targets. *J Mol Biol* 425, 3678–3697 (2013).
- 678 45. Mika, J. T. & Poolman, B. Macromolecule diffusion and confinement in prokaryotic cells.  
679 *Curr Opin Biotechnol* 22, 117–126 (2011).

- 680 46. Bakshi, S., Siryaporn, A., Goulian, M. & Weisshaar, J. C. Superresolution imaging of  
681 ribosomes and RNA polymerase in live *Escherichia coli* cells. *Mol Microbiol* 85, 21–38  
682 (2012).
- 683 47. Sanamrad, A. *et al.* Single-particle tracking reveals that free ribosomal subunits are not  
684 excluded from the *Escherichia coli* nucleoid. *Proc Natl Acad Sci U S A* 111, 11413–11418  
685 (2014).
- 686 48. Volkov, I. L. *et al.* tRNA tracking for direct measurements of protein synthesis kinetics in live  
687 cells. *Nat Chem Biol* 14, 618–626 (2018).
- 688 49. Lopez, P. J., Marchand, I., Joyce, S. A. & Dreyfus, M. The C-terminal half of RNase E,  
689 which organizes the *Escherichia coli* degradosome, participates in mRNA degradation but  
690 not rRNA processing in vivo. *Mol Microbiol* 33, 188–199 (1999).
- 691 50. Leroy, A., Vanzo, N. F., Sousa, S., Dreyfus, M. & Carpousis, A. J. Function in *Escherichia*  
692 *coli* of the non-catalytic part of RNase E: role in the degradation of ribosome-free mRNA.  
693 *Mol Microbiol* 45, 1231–1243 (2002).
- 694 51. Massé, E., Escorcía, F. E. & Gottesman, S. Coupled degradation of a small regulatory RNA  
695 and its mRNA targets in *Escherichia coli*. *Genes Dev* 17, 2374–2383 (2003).
- 696 52. Datsenko, K. A. & Wanner, B. L. One-step inactivation of chromosomal genes in  
697 *Escherichia coli* K-12 using PCR products. *Proc Natl Acad Sci U S A* 97, 6640–6645  
698 (2000).
- 699 53. Aiba, H., Adhya, S. & de Crombrughe, B. Evidence for two functional gal promoters in  
700 intact *Escherichia coli* cells. *J Biol Chem* 256, 11905–11910 (1981).
- 701 54. Desnoyers, G. & Massé, E. Noncanonical repression of translation initiation through small  
702 RNA recruitment of the RNA chaperone Hfq. *Genes Dev* 26, 726–739 (2012).
- 703 55. Desnoyers, G., Morissette, A., Prévost, K. & Massé, E. Small RNA-induced differential  
704 degradation of the polycistronic mRNA iscRSUA. *EMBO J* 28, 1551–1561 (2009).
- 705 56. Moffitt, J. R., Pandey, S., Boettiger, A. N., Wang, S. & Zhuang, X. Spatial organization  
706 shapes the turnover of a bacterial transcriptome. *elife* 5, (2016).
- 707 57. Taylor, S. C., Carbonneau, J., Shelton, D. N. & Boivin, G. Optimization of Droplet Digital  
708 PCR from RNA and DNA extracts with direct comparison to RT-qPCR: Clinical implications  
709 for quantification of Oseltamivir-resistant subpopulations. *J Virol Methods* 224, 58–66  
710 (2015).
- 711 58. Prévost, K. *et al.* The small RNA RyhB activates the translation of shiA mRNA encoding a  
712 permease of shikimate, a compound involved in siderophore synthesis. *Mol Microbiol* 64,  
713 1260–1273 (2007).
- 714 59. Zhang, A., Wassarman, K. M., Ortega, J., Steven, A. C. & Storz, G. The Sm-like Hfq protein  
715 increases OxyS RNA interaction with target mRNAs. *Mol Cell* 9, 11–22 (2002).
- 716 60. Morita, T., Maki, K. & Aiba, H. Detection of sRNA-mRNA interactions by electrophoretic  
717 mobility shift assay. *Methods Mol Biol* 905, 235–244 (2012).
- 718 61. Park, S., Bujnowska, M., McLean, E. L. & Fei, J. Quantitative Super-Resolution Imaging of  
719 Small RNAs in Bacterial Cells. *Methods Mol Biol* 1737, 199–212 (2018).
- 720 62. Fei, J. *et al.* RNA biochemistry. Determination of in vivo target search kinetics of regulatory  
721 noncoding RNA. *Science* 347, 1371–1374 (2015).
- 722 63. Park, S. *et al.* Conducting Multiple Imaging Modes with One Fluorescence Microscope. *J*  
723 *Vis Exp* (2018). doi:10.3791/58320

- 724 64. Sadoon, A. A. & Wang, Y. Anomalous, non-Gaussian, viscoelastic, and age-dependent  
725 dynamics of histonelike nucleoid-structuring proteins in live *Escherichia coli*. *Phys. Rev. E*  
726 98, 042411 (2018).
- 727 65. Crocker, J. & Grier, D. Methods of Digital Video Microscopy for Colloidal Studies. *J Colloid*  
728 *Interface Sci* 179, 298–310 (1996).
- 729 66. Reyer, M. A., McLean, E. L., Chennakesavalu, S. & Fei, J. An automated image analysis  
730 method for segmenting fluorescent bacteria in three dimensions. *Biochemistry* 57, 209–215  
731 (2018).
- 732
- 733

734

735

736 **Figures**

737

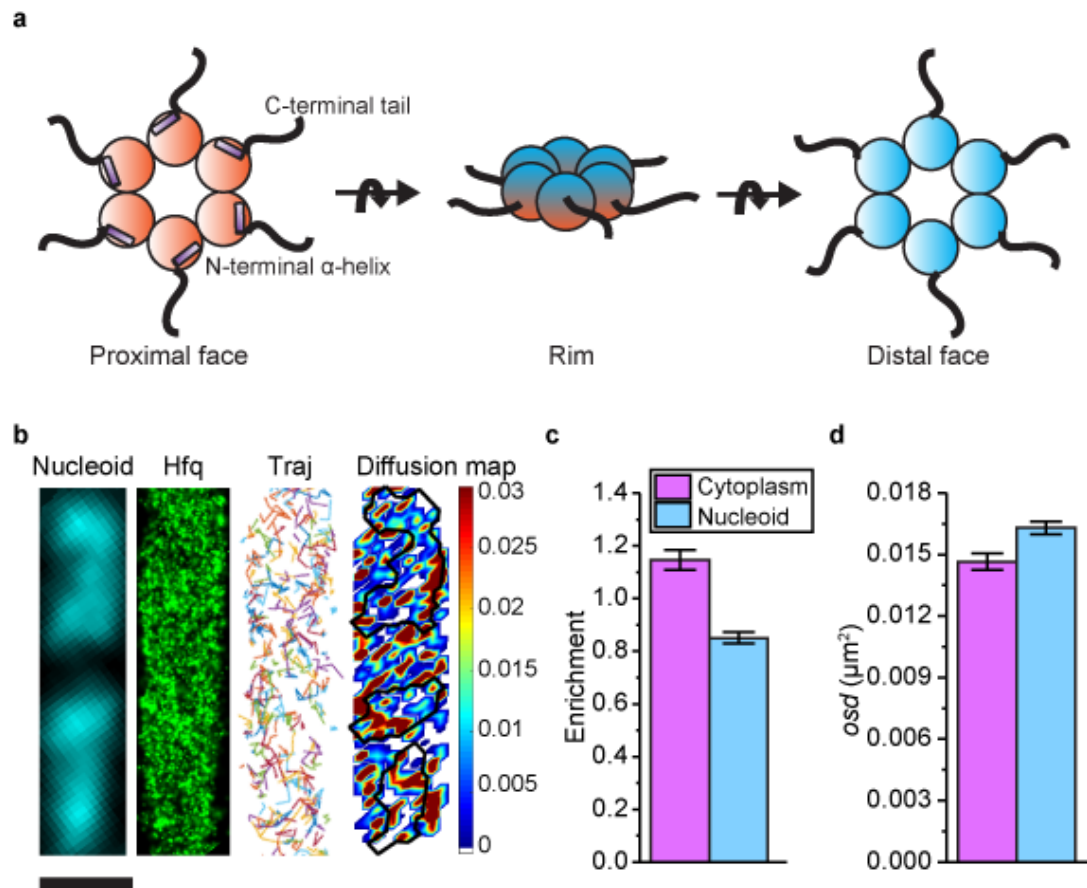

738

739 **Figure 1. Diffusion and localization of Hfq during exponential growth. a,** Schematic

740 representation of Hfq with three RNA binding faces indicated. **b,** Representative image of WT hfq-

741 mMaple3 in WT *rne* background during exponential growth under no treatment (NT) condition.

742 Nucleoid is stained with Hoechst in live cells. 2D reconstruction image of Hfq-mMaple is shown

743 in the black background. Different diffusion trajectories from tracking algorithm are shown in

744 different colors ("Traj"). *osd* (unit:  $\mu\text{m}^2$ ) at each coordinate of the cell is shown as heatmap, in

745 which the black curves show the nucleoid region defined by Hoechst staining. The scale bar

746 represents 1  $\mu\text{m}$ . **c,** Enrichment of Hfq localization is calculated for nucleoid region and cytoplasm

747 region under NT condition. **d,** Average *osd* of Hfq within the nucleoid and cytoplasm regions under

748 NT condition. Error bars in all plots represent the standard deviation (s.d.) from 2 experimental  
749 replicates, each containing ~60 cells.

750

751

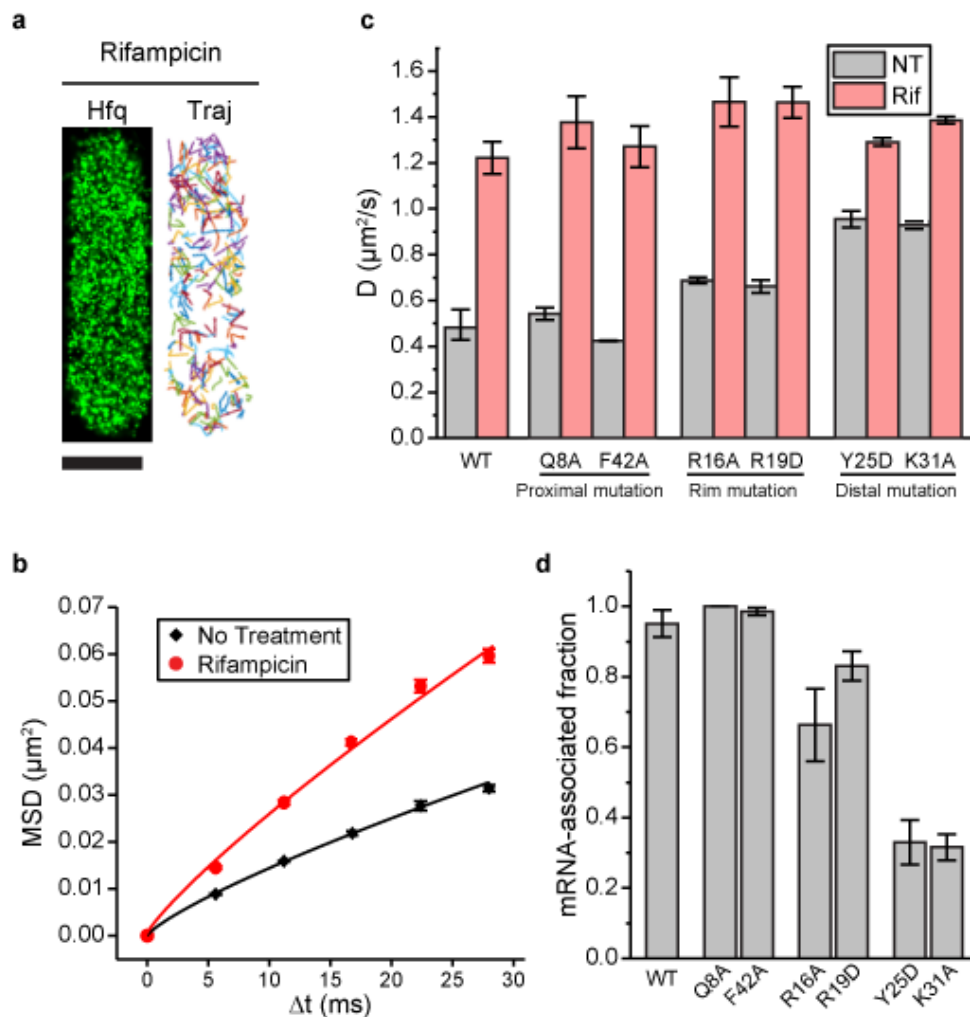

752

753 **Figure 2. Binding of mRNAs to Hfq decreases its diffusivity primarily through the distal**

754 **face of Hfq. a**, Representative image of Hfq-mMaple3 with rifampicin treatment (Rif). 2D

755 reconstruction image is shown in the black background (left), and different diffusion trajectories

756 from tracking algorithm are shown in different colors (right). The scale bar represents 1  $\mu\text{m}$ . **b**,

757 Mean square displacement (MSD) is plotted against the time interval ( $\Delta t$ ) for Hfq-mMaple3. The

758 power law fitting curves are shown. **c**, Ensemble diffusion coefficients are plotted for WT and six

759 mutations of Hfq-mMaple3 under NT and Rif conditions. **d**, mRNA-associated fraction for WT and

760 mutant Hfq under NT case. Error bars in all plots represent the s.d. from 2 or 3 experimental

761 replicates, each containing  $\sim 100$  cells.

762

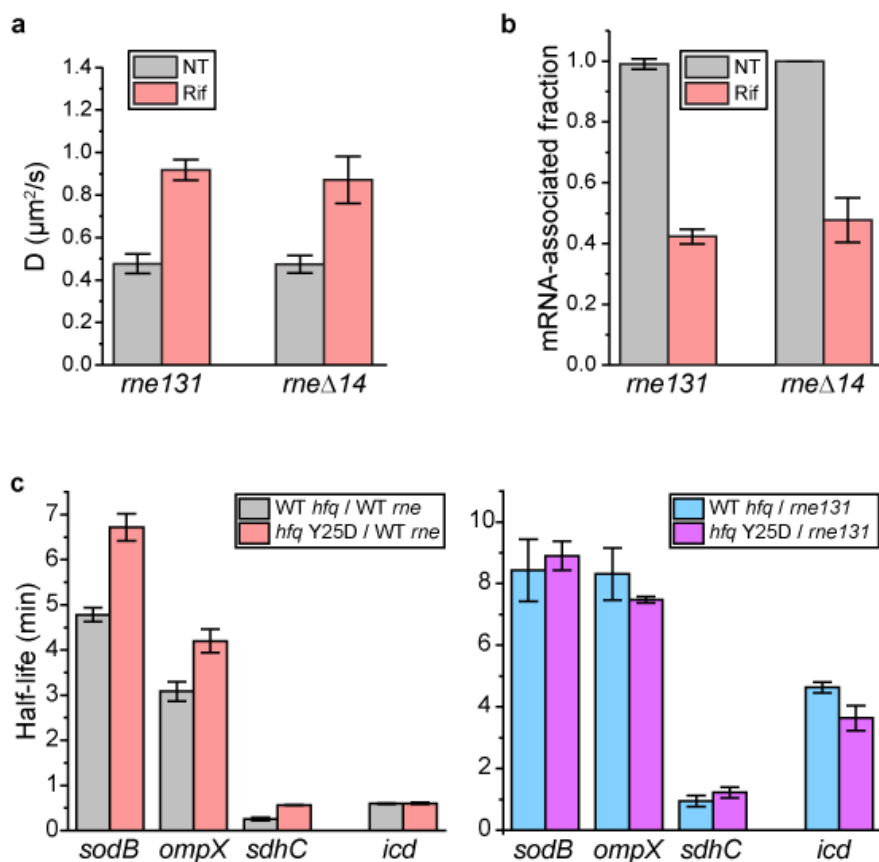

763

764

765 **Figure 3. Hfq-RNase E interaction contributes to the degradation of mRNAs.** a, Diffusion

766 coefficients are plotted for WT *hfq*-mMaple3 in the *me131* and *meΔ14* backgrounds under NT

767 and Rif conditions. b, mRNA-associated fraction of WT Hfq in the *me131* and *meΔ14*

768 backgrounds under NT and Rif conditions. c, Half-lives of selected mRNAs determined by

769 Northern blots (Figure S6). sRNA regulators of these mRNAs were knocked out ( $\Delta$ *ryhBΔfnrS* for

770 *sodB*,  $\Delta$ *cyaRΔmicA* for *ompX* and  $\Delta$ *ryhBΔspfΔrybB* for *sdhC*). Error bars in all plots represent the

771 s.d. from 2 or 3 experimental replicates. Each imaging experiment contains ~100 cells.

772

773

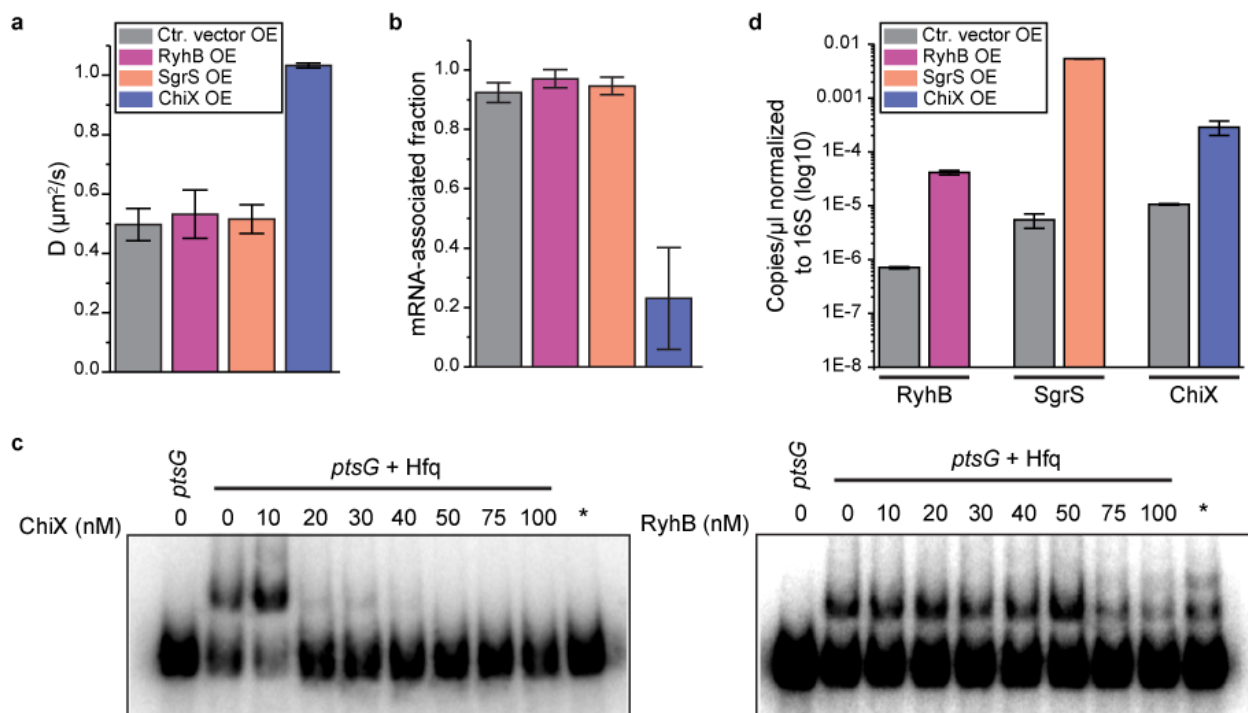

774

775

776 **Figure 4. sRNAs can displace mRNA from in a face-dependent way. a**, Diffusion coefficients

777 of Hfq-mMaple3 with RyhB, SgrS or ChiX over-expressed from an IPTG inducible promoter. **b**,

778 mRNA-associated fraction for Hfq, for the same cases as in a. Error bars in all plots represent the

779 s.d. from 2 experimental replicates, each containing ~100 cells. **c**, Competition of ChiX and RyhB

780 on pre-occupied Hfq. 20 nM of a *ptsG* RNA fragment was pre-incubated with 100 nM Hfq before

781 addition of increasing concentrations of ChiX or RyhB sRNA. (\*) = Hfq (100 nM) and ChiX or RyhB

782 (100 nM) were simultaneously added to 20 nM *ptsG* fragment. Data is representative of 3

783 independent experiments.  $K_d$  measurements of RyhB, ChiX and *ptsG* fragment binding to Hfq are

784 shown in Figure S7. **d**, Abundance of RyhB, SgrS or ChiX in a control condition (Ctr. vector) or

785 for each sRNA over-expressed from an IPTG inducible promoter, normalized to 16S rRNA

786 measured by ddPCR.

787

788

789



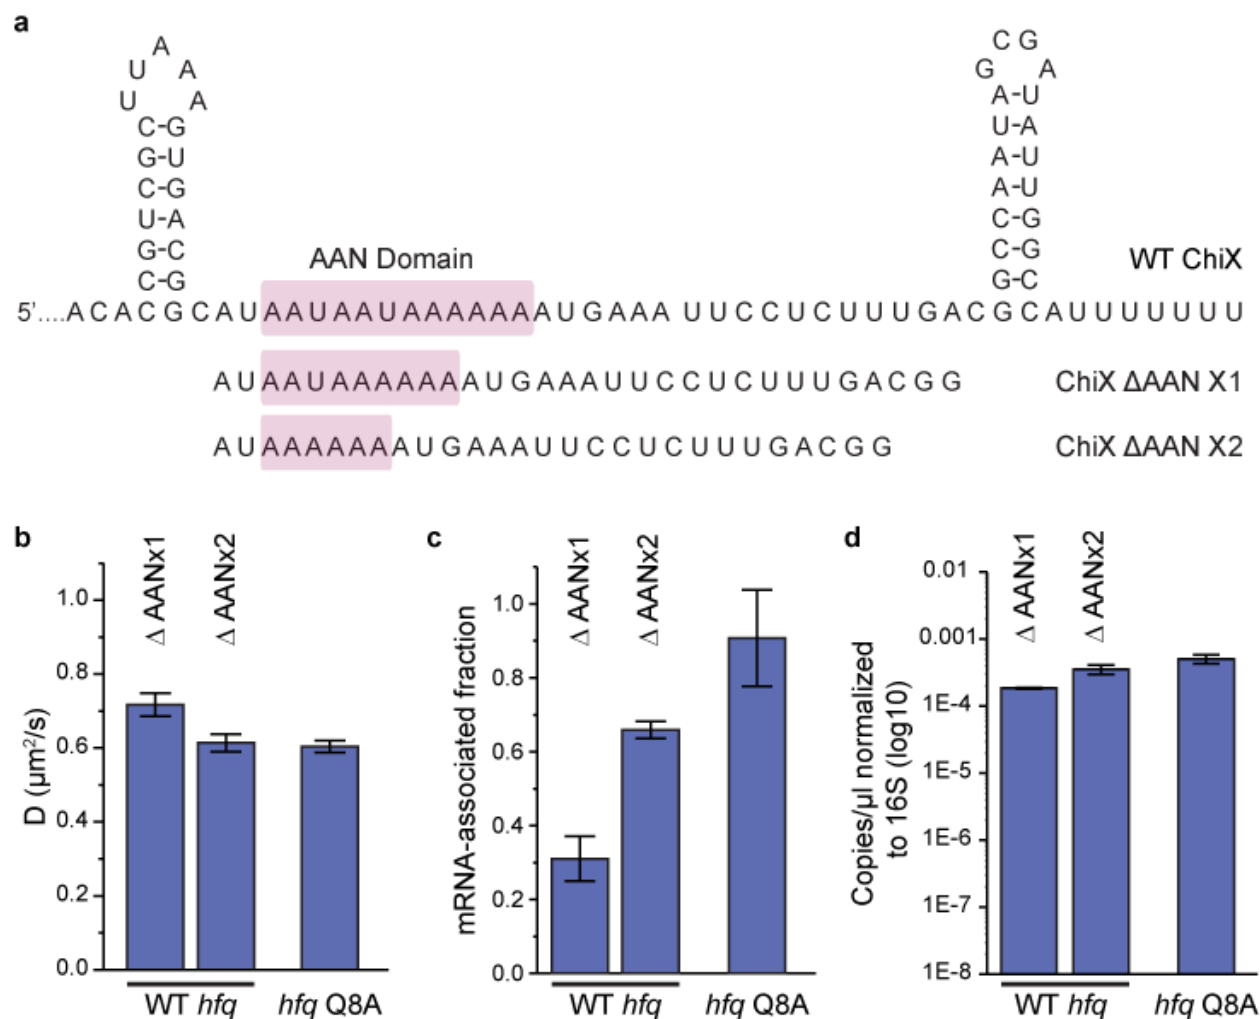

790  
 791 **Figure 5. Both interactions at the proximal and distal face contributes to the competitive**  
 792 **binding of ChiX.** **a**, Sequences of WT ChiX and two ChiX mutants (with one or two AAN motif  
 793 deleted). **b**, Diffusion coefficients and **c**, mRNA-associated fraction of Hfq-mMaple3 with ChiX  
 794 mutants over-expressed, or Hfq Q8A-mMaple with WT ChiX over-expressed. **d**, Abundance of  
 795 ChiX ΔAANx1-2 mutants in the WT *hfq-mMaple3* and WT ChiX in the *hfq* Q8A-*mMaple3*  
 796 background normalized to 16S rRNA measured by ddPCR.

797

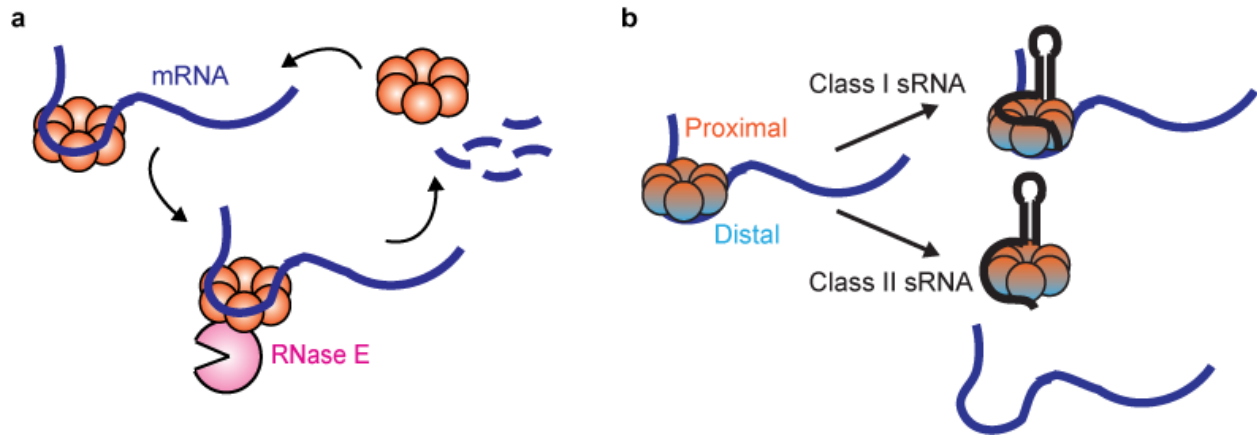

798

799

800 **Figure 6. Dynamic interactions between Hfq and cellular RNAs.** a, Hfq facilitates the  
801 degradation of certain Hfq-bound mRNAs through the recruitment of RNase E. b, Class I or Class  
802 II sRNAs can get access of mRNA-associated Hfq through co-occupying different binding sites of  
803 Hfq simultaneously, or displacing mRNA from the distal face of Hfq respectively.

804

805
